# Supplementary material for: Glucose-Assisted Synthesis of Porous, Urchin-like Co3O4 Hierarchical Structures for Low-Concentration Hydrogen Sensing Materials
Source: MDPI journal article supplement (doi:10.3390/ma17061364), 2024-03-16
Supplement: s1 [file s1]

# Supporting information

## Glucose-assisted synthesis of porous urchin-like $\text{Co}_3\text{O}_4$ hierarchical structures for low-concentration hydrogen sensing materials

Xin Deng<sup>a,b,c</sup>, Xiao Zhang<sup>a,b,\*</sup>, Xiaochuan Long<sup>a,b,c</sup>, Xiaopeng Liu<sup>a,b,c,\*</sup>

<sup>a</sup>State Key Laboratory of Advanced Materials for Smart Sensing, China GRINM Group Co., Ltd., Beijing 100088, China

<sup>b</sup>GRIMAT Engineering Institute Co., Ltd., Beijing 101407, China

<sup>c</sup>General Research Institute for Nonferrous Metals, Beijing, 100088, China

### 1 Measurement of gas sensing performance

A simple schematic diagram of the JF02 gas sensing system was showed in **Figure S1**. All gases used to test was injected by external gas cylinders and mixed in the “Mixture Chamber”. The mass flow and concentration of gases was controlled by the “Mass Flow” module which was monitored though flowmeter. The temperature controlled in the sensing process was realized though the heat platform in the closed “Test Chamber”. The resistance signal changes were captured by a pair of electrode probe in the “Test Chamber”, processed by the “Test Module” and transmission in to PC.

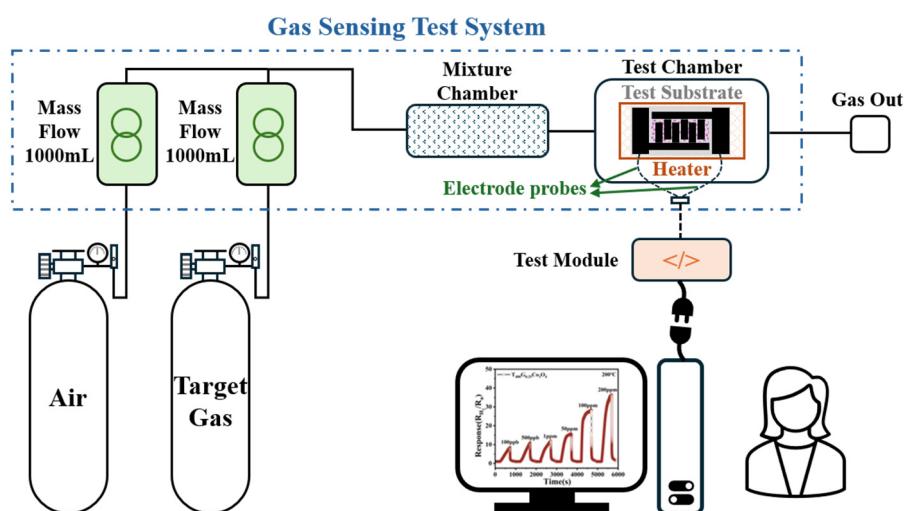

**Figure S1.** Schematic diagram of JF02 system

## 2 Morphology and Structure of Porous Urchin-like $\text{Co}_3\text{O}_4$

The mass loss of 4  $\text{Co}_3\text{O}_4$  precursors are mainly concentrated at 200-300°C, which was calculated to be 19.40%, 21.40%, 20.64% and 20.80% by TGA results respectively. And the material tends to be stable at 400-900°C (**Figure S2**). Calcination temperature can be set to 400°C to ensure that the  $\text{Co}_2(\text{OH})_2\text{CO}_3 \cdot 11\text{H}_2\text{O}$  is oxidized to  $\text{Co}_3\text{O}_4$  and protect urchin-like structure from collapse.

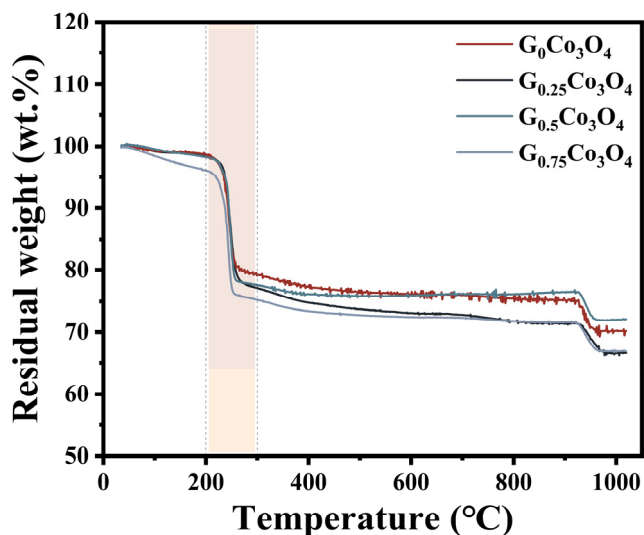

Figure S2. TGA curves of  $\text{Co}_3\text{O}_4$  precursors

Due to the low crystallinity of the precursor, the XRD pattern showed a large bulging peak (**Figure S3**), and the diffraction peak under the bulging peak corresponds to the  $\text{Co}_2(\text{OH})_2\text{CO}_3 \cdot 11\text{H}_2\text{O}$  phase (PDF#48-0083).

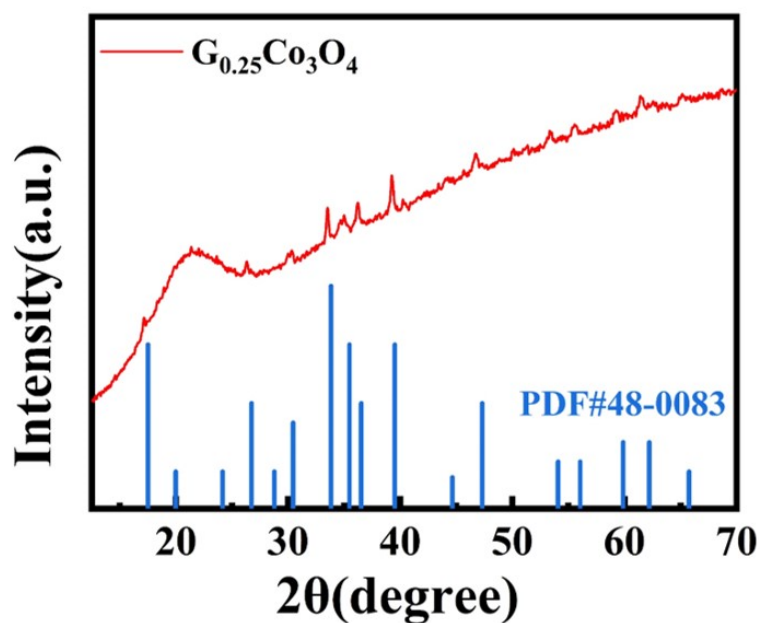

Figure S3. XRD pattern of  $\text{G}_{0.25}\text{Co}_3\text{O}_4$

After calcinating process, rod-shaped  $G_0Co_3O_4$  is seriously aggregated into bolck, and which is tightly composed of nanoparticles with few stacked pores (**Figure S4a**). Partial nanoneedle structure was retained of  $T_{400}G_{0.5}Co_3O_4$  (**Figure S4b**), while  $T_{400}G_{0.75}Co_3O_4$  illustrated a structure of near-solid microspheres (**Figure S4c**). The structure above went against to obtain high specific surface area.

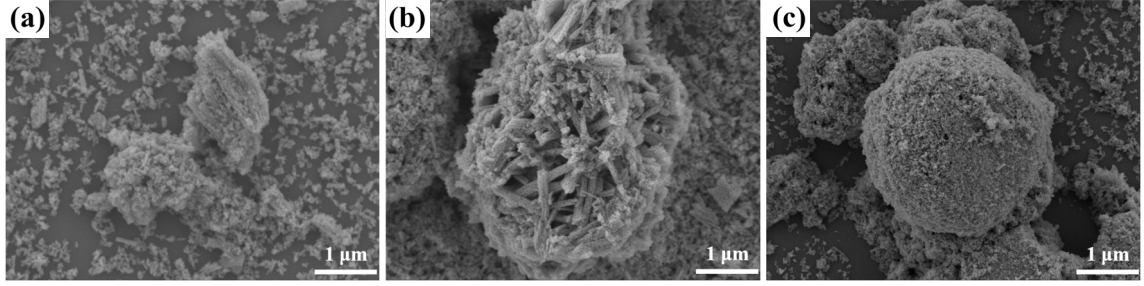

**Figure S4.** SEM images of  $T_{400}G_xCo_3O_4$ : (a)  $T_{400}G_0Co_3O_4$ ; (b)  $T_{400}G_{0.5}Co_3O_4$ ; (c)  $T_{400}G_{0.75}Co_3O_4$

### 3 Hydrogen sensing performance of porous urchin-like $Co_3O_4$

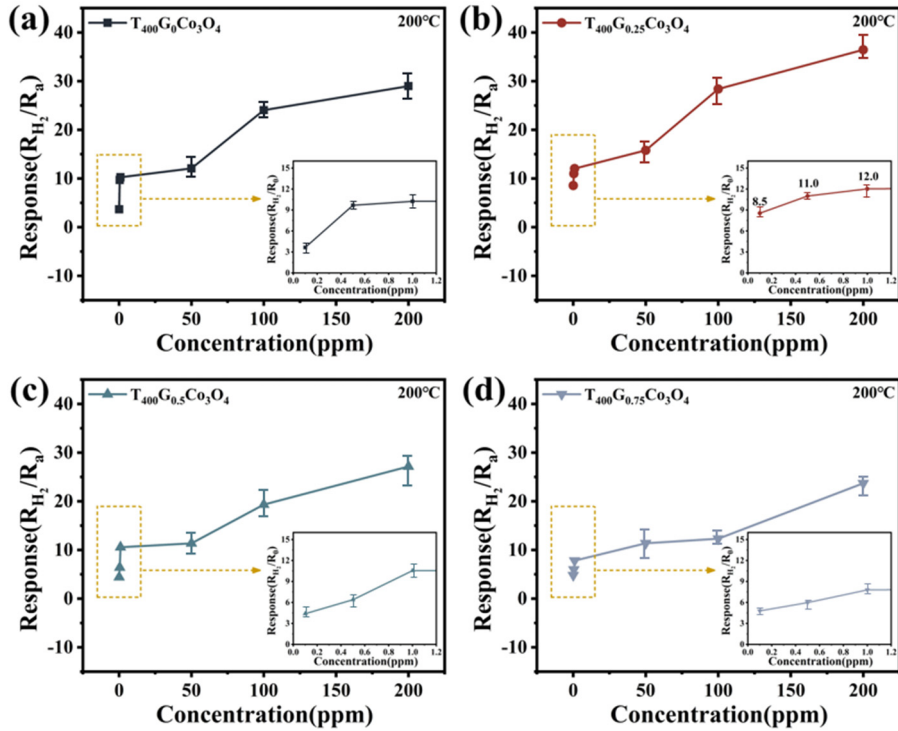

**Figure S5.** Response to different concentrations of  $H_2$  at 200°C: (a)  $T_{400}G_0Co_3O_4$ ; (b)  $T_{400}G_{0.25}Co_3O_4$ ; (c)  $T_{400}G_{0.5}Co_3O_4$ ; (d)  $T_{400}G_{0.75}Co_3O_4$

The response of the material to hydrogen in each cycle is comparable and can return to the initial base value (**Figure S6**), indicating that the material has good repeatability.

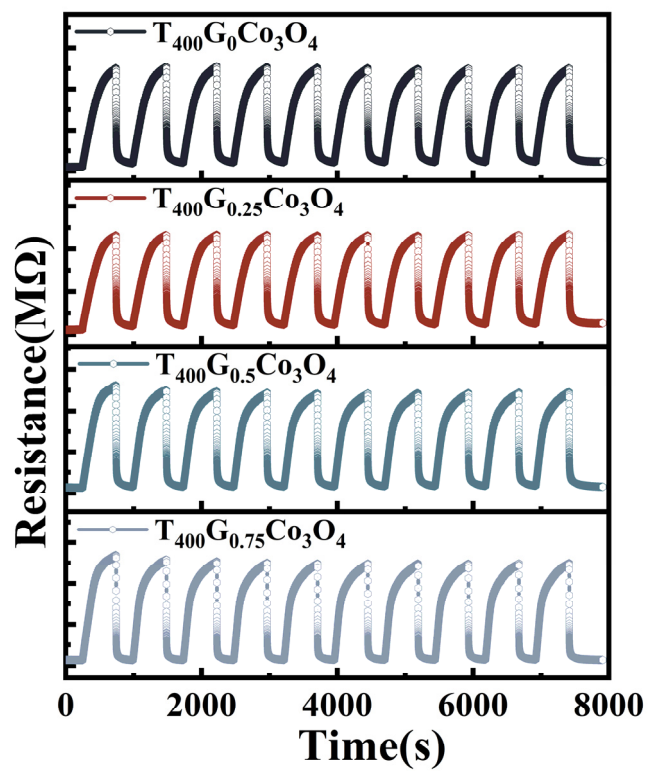

Figure S6. Dynamic response curve of  $T_{400}G_xCo_3O_4$  at 200°C after 9 hydrogen cycles
